# Supplementary material for: Axon-Axon Interactions Regulate Topographic Optic Tract Sorting via CYFIP2-Dependent WAVE Complex Function
Source: PubMed Central journal article supplement (PMC5855093; doi:10.1016/j.neuron.2018.01.027), 2018-03-07
Supplement: mmc1.pdf [file mmc1.pdf]

**Neuron, Volume 97**

**Supplemental Information**

**Axon-Axon Interactions Regulate**

**Topographic Optic Tract Sorting**

**via CYFIP2-Dependent WAVE Complex Function**

**Jean-Michel Cioni, Hovy Ho-Wai Wong, Dario Bressan, Lay Kodama, William A. Harris, and Christine E. Holt**

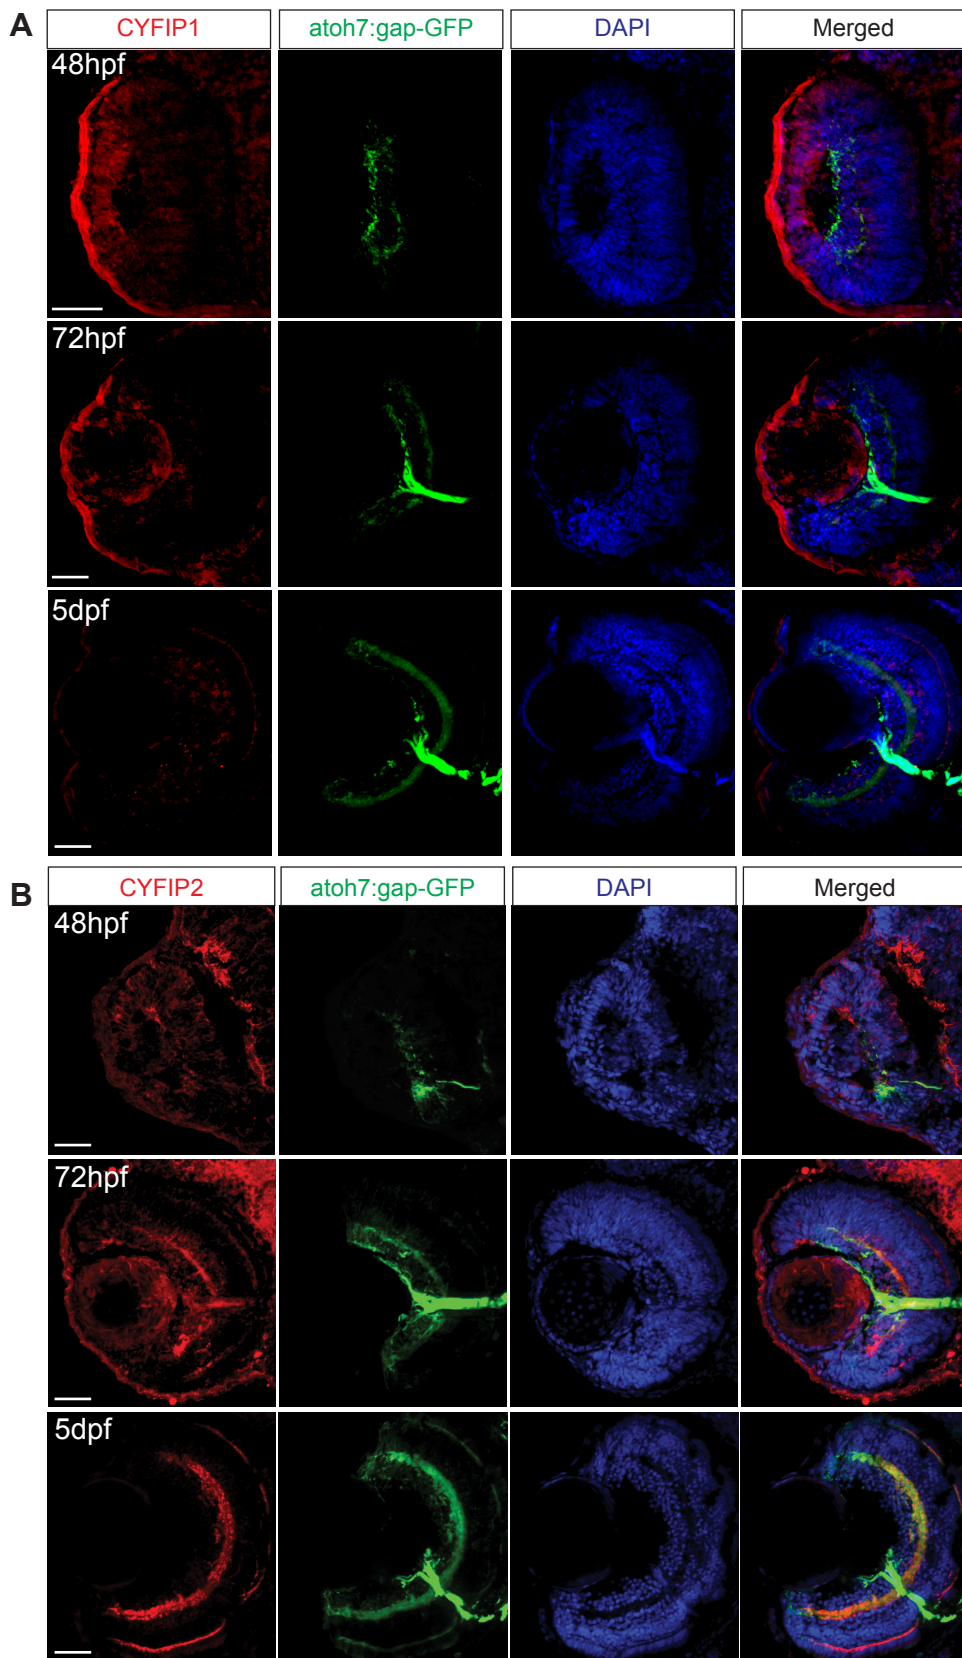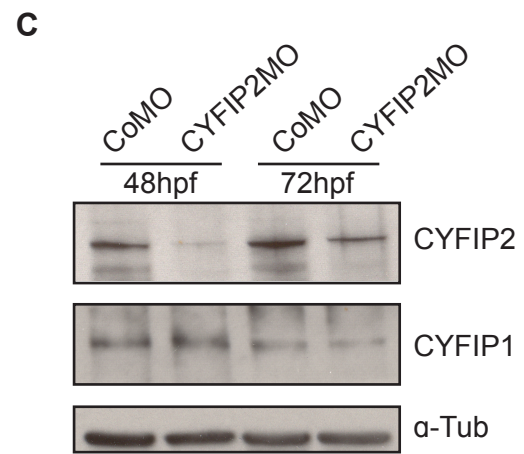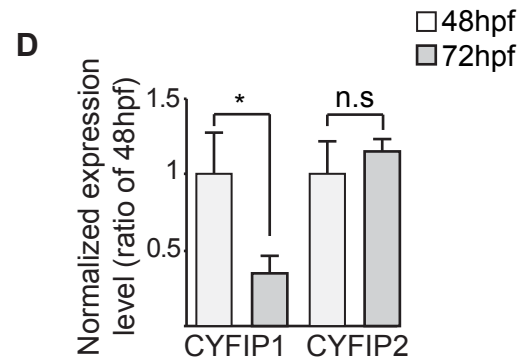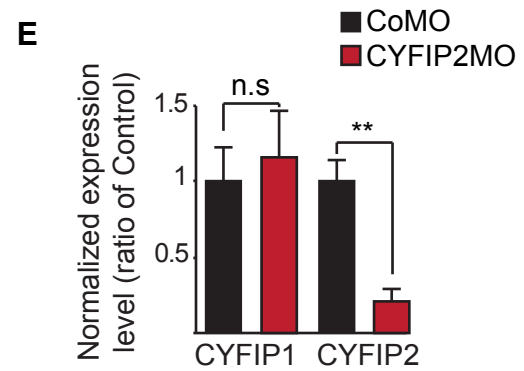

**FIGURE S1**

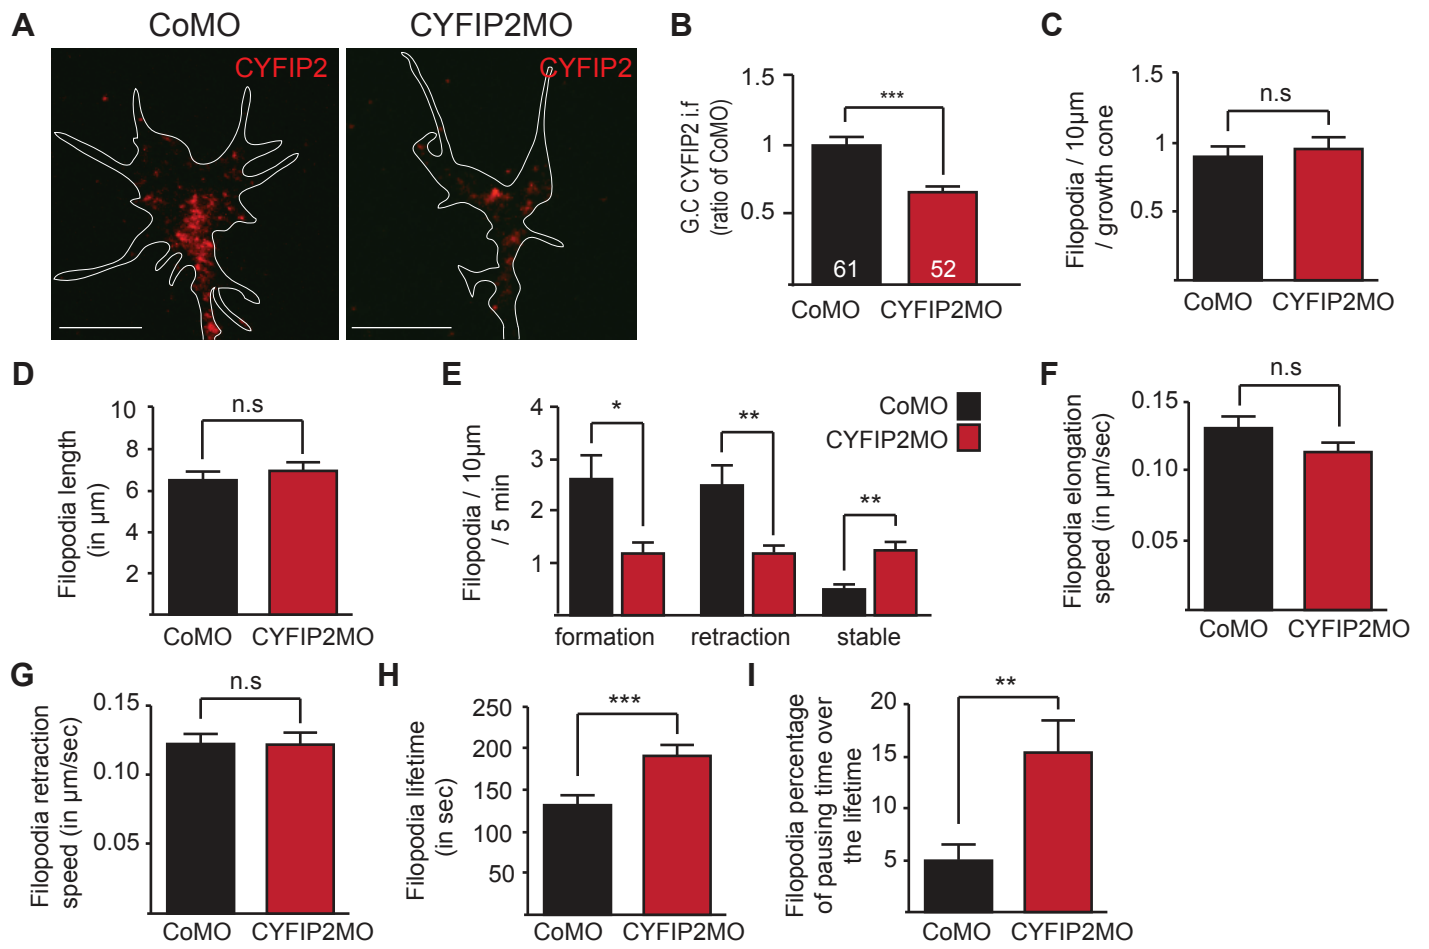

**FIGURE S2**

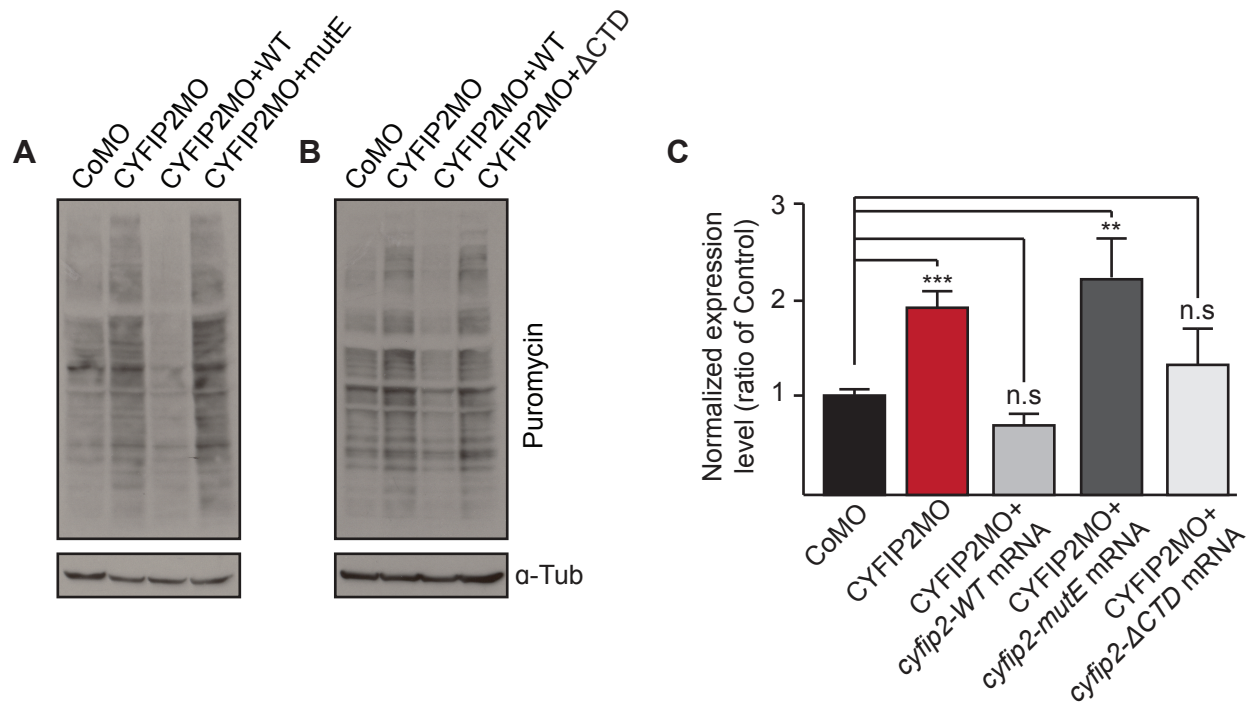

**FIGURE S3**

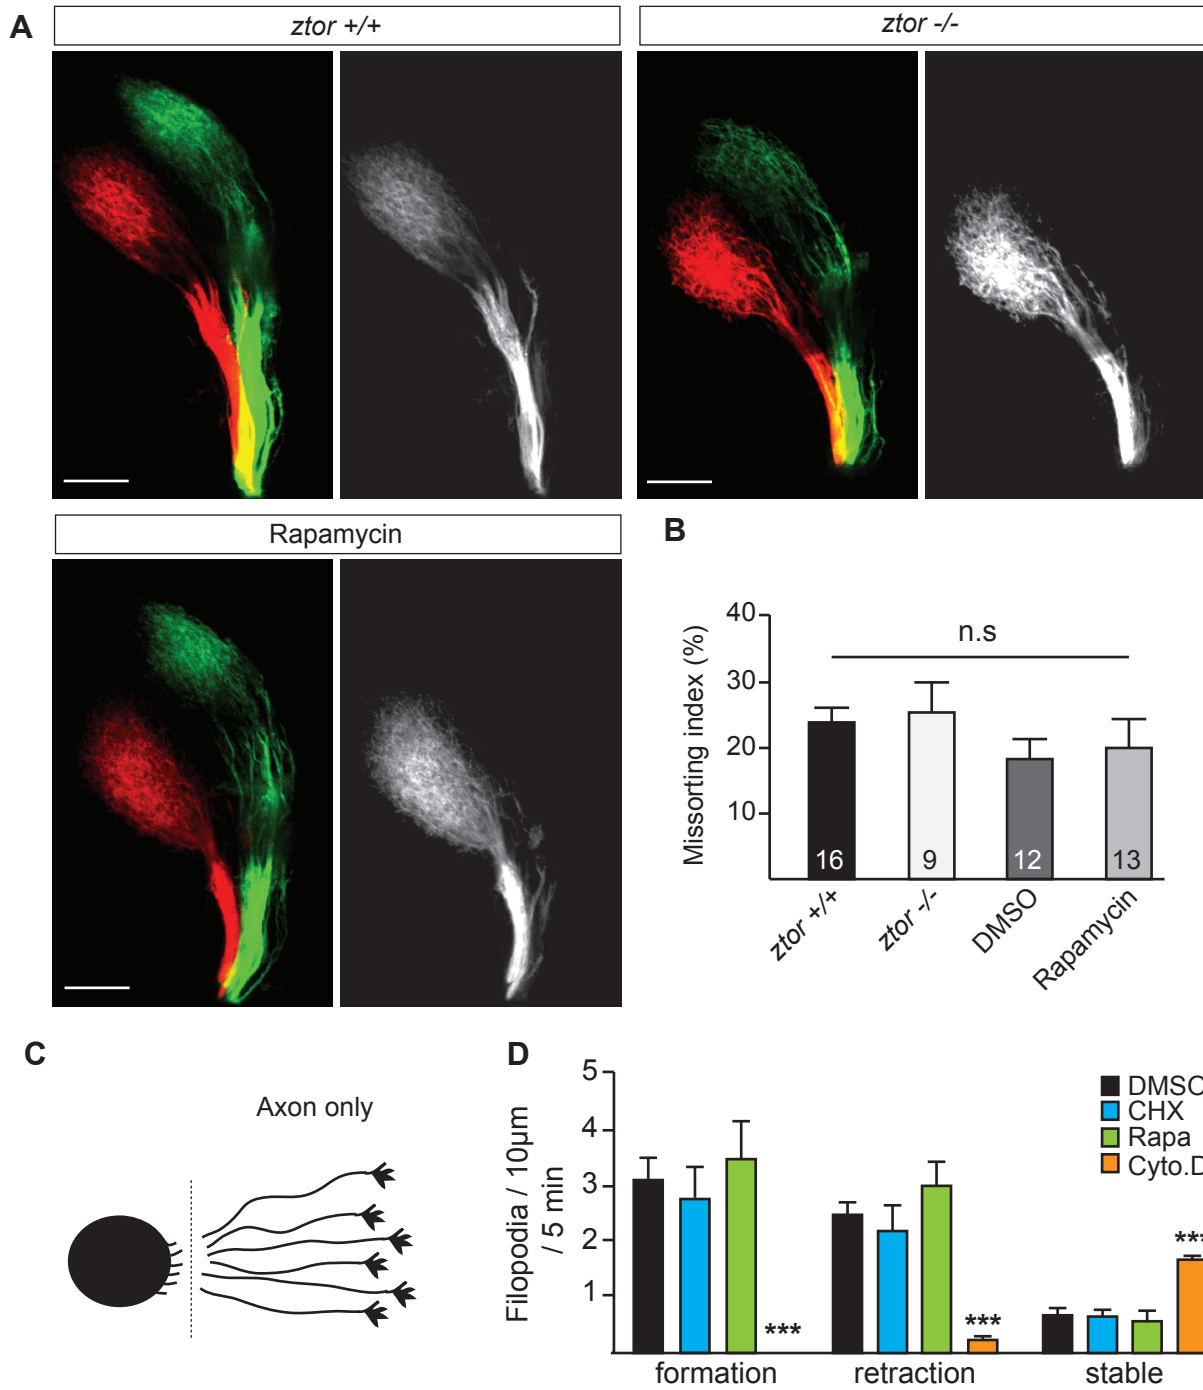

**FIGURE S4**

## Supplementary information

### **Figure S1: Related to Figure 1. CYFIP1 and CYFIP2 expression during early zebrafish retina development.**

(A) Representative immunostainings of CYFIP1 and DAPI at 48hpf, 72hpf and 5dpf on retina slices from *atoh7:gap-GFP* zebrafish line (n=8 zebrafish for each developmental stage). Scale bars=50 $\mu$ m. (B) Representative immunostainings of CYFIP2 and DAPI at 48hpf, 72hpf and 5dpf on retina slices from *atoh7:gap-GFP* zebrafish line (n=12 zebrafish for each developmental stage). Scale bars=50 $\mu$ m. (C-E) Representative western blots for CYFIP1 and CYFIP2 on zebrafish heads lysates at 48hpf and 72hpf for CoMO- and CYFIP2MO-injected embryos. (D) Quantifications of the signal obtained for CYFIP1 and CYFIP2 at 48hpf compared to 72hpf (n=4, normalized to  $\alpha$ -Tubulin, Mann Whitney test). (E) Quantifications of the signal obtained for CYFIP1 and CYFIP2 at 48hpf in CoMO and CYFIP2MO conditions (n=4, normalized to  $\alpha$ -Tubulin). Error bars represent SEM. \*p<0.05, \*\*p<0.01, n.s: non-significant (Mann Whitney test for D and E).

### **Figure S2: Related to Figure 4. CYFIP2 regulates the dynamic behaviors of filopodia in RGC growth cones.**

(A) Representative CYFIP2 immunostainings on stage 32 *Xenopus* retinal growth cone (GC) in CoMO and CYFIP2MO conditions. (B) Quantification of CYFIP2 signal intensity in GC of CYFIP2MO- compared to CoMO-injected embryos. Number of axons analyzed is indicated on the graph. (C, D) Quantifications of the number (C) and length (D) of GC filopodia in CYFIP2MO (n=18 GC, n=101 filopodia) compared to CoMO (CoMO: n=16 GC, n=80 filopodia) conditions. (E) Quantifications of the frequency of formation, retraction and stable filopodia in GCs from CYFIP2MO-injected (n=17 GC) compared to CoMO-injected (n=15 GCs) retina explants over 5min recording. (F) Quantifications of the speed during active filopodia elongation in CYFIP2MO (n=15 filopodia) compared to CoMO (n=15 filopodia) conditions. (G) Quantifications of the speed during active filopodia retraction in CYFIP2MO

(n=13 filopodia) compared to CoMO (n=10 filopodia) conditions. (H) Quantifications of filopodia lifetime in CYFIP2MO (n=13 GC, n=97 filopodia) compared to CoMO (n=11 GC, n=111 filopodia) conditions. (I) Percentage of the time spent pausing during the filopodia lifetime. Error bars represent SEM. \* p<0.05, \*\* p<0.01, \*\*\* p<0.001, n.s: non-significant (Mann Whitney test for B-I). Scale bars 5µm.

**Figure S3: Related to Figure 7. CYFIP2 exerts a translational control *in vivo***

(A-B) Representative western blots showing puromycin incorporation in 48hpf zebrafish embryos for the indicated conditions. (C) Quantification of the signal obtained for puromycin normalized to  $\alpha$ -Tubulin. Co-injection of CYFIP2MO + *CYFIP2WT* (n=7 experiments) or *CYFIP2 $\Delta$ CTD* (n=4 experiments), but not *CYFIP2mutE* (n=5 experiments), mRNAs rescue the increase in puromycin signal observed in CYFIP2MO-injected embryos (n=7 experiments) compared to CoMO (n=7 experiments). Error bars represent SEM. \*\* p<0.01, \*\*\* p<0.001, n.s: non-significant (Mann Whitney test).

**Figure S4: Related to Figure 7. Translation regulation is not required for proper growth cone filopodial dynamics and D-V axon sorting.**

(A) Dorsal and Ventral RGC axons were labeled by respective injections of Dil (red) and DiO (green) fluorescent dyes in zebrafish embryos retina at 5dpf. Scale bars: 50 µm. (B) The missorting index (MI) was quantified as the ratio of the intensity signal of the missorted D (Dm) axons to all the D axons (Dm+Ds) (Mann Whitney test, n.s: non significant). The number of zebrafish analyzed is indicated on the bars. (C) Schematic illustrating the axon-only culture used for the analysis of filopodia dynamics. (D) Quantifications of the frequency of formation, retraction and stable filopodia in growth cones of axon-only explants treated with DMSO (n=7 GC), cycloheximide (CHX) (n=7 GC), rapamycin (rapa) (n=6 GC) and cytochalasin D (cyto.D) (n=7 GC). Error bars represent SEM. \*\*\* p<0.001 (Mann Whitney test for B and D).
